# Supplementary material
Source: Elsevier journal article supplement (https://www.sciencedirect.com/science/article/pii/S0213911121001114)
Supplement: mmc1 [file S0213911121001114:mmc1.doc]

**Anexo I. Protocolo para el análisis desde la perspectiva de género de los contenidos de los**

**capítulos de Leucemia en libros de Hematología y Medicina Interna.**

INTRODUCCIÓN Y ANTECEDENTES

1. ¿El texto justifica si es relevante (o no) el género para el tema de estudio?

2. ¿El texto justifica si es relevante (o no) el sexo para el tema de estudio?

3. ¿Se describe que, en la mayoría de los estudios preclínicos, hombres y mujeres no están

igualmente representados?

EPIDEMIOLOGÍA

4. ¿Se menciona que existen diferencias por sexo en la incidencia?

5. ¿Se menciona que existen diferencias por sexo en la mortalidad?

6. ¿Se menciona que existen diferencias por sexo el pronóstico?

7. ¿Se menciona que existen diferencias por sexo en la supervivencia?

8. ¿Se describen las causas conocidas o las posibles hipótesis que se plantean para justificar

la diferencia por sexo en la incidencia?

9. ¿Se describen las causas conocidas o las posibles hipótesis que se plantean para justificar

la diferencia por sexo en la mortalidad?

10. ¿Se describen las causas conocidas o las posibles hipótesis que se plantean para justificar

la diferencia por sexo en el pronóstico?

11. ¿Se describen las causas conocidas o las posibles hipótesis para justificar las diferencias

por sexo en la supervivencia?

ETIOLOGÍA

12. ¿Se menciona que existen factores de riesgo asociados a un sexo?

13. ¿Se describen factores de riesgo asociados a un sexo?

PATOGENIA

14. ¿Se describen diferencias en el proceso fisiopatológico de hombres y mujeres?

15. ¿Se menciona que el proceso fisiopatológico involucra diferencias en los cromosomas

sexuales?

16. ¿Se menciona que el proceso fisiopatológico involucra diferencias en los niveles

hormonales de hombres y mujeres?

17. ¿Se describen las causas conocidas o las posibles hipótesis para justificar las diferencias

en los cromosomas sexuales?

18. ¿Se describen las causas conocidas o las posibles hipótesis para justificar las diferencias

en los niveles hormonales de hombres y mujeres?

19. ¿Se menciona la existencia de diferencias por sexo en la presentación de síntomas?

20. ¿Se menciona si presentan mujeres y hombres la misma historia natural de la

enfermedad?

DIAGNÓSTICO

21. ¿Se describen diferencias por sexo en los parámetros de laboratorio?

22. ¿Se describen características del diagnóstico en embarazadas?

TRATAMIENTO

23. ¿Se describen diferencias en el tratamiento para hombres y mujeres?

24. ¿Se describen diferencias en el tratamiento para las mujeres embarazadas?

25. ¿Se describe cómo proteger la función ovárica en las mujeres que requieren tratamiento

con quimioterapia?

16

26. ¿Se describen las diferencias por sexo en la farmacocinética (absorción, metabolismo y

eliminación) de la quimioterapia?

27. ¿Se menciona que existen diferencias por sexo en la eficacia de la quimioterapia?

28. ¿Se menciona que existen diferencias por sexo en la toxicidad a la quimioterapia?

29. ¿Se menciona que existen diferencias por sexo en la respuesta a la quimioterapia?

30. ¿Se menciona que existen diferencias por sexo en los efectos secundarios a la

quimioterapia?

31. ¿Se describen las causas conocidas o las posibles hipótesis que justifican las diferencias

por sexo en la eficacia de la quimioterapia?

32. ¿Se describen las causas conocidas o las posibles hipótesis que justifican las diferencias

por sexo en la toxicidad a la quimioterapia?

33. ¿Se describen las causas conocidas o las posibles hipótesis que justifican las diferencias

por sexo en la respuesta a la quimioterapia?

34. ¿Se describen las causas conocidas o las posibles hipótesis para justificar las diferencias

por sexo en los efectos secundarios a la quimioterapia?

35. ¿Se menciona que existen diferencias en el riesgo de enfermedad de injerto contra

huésped (EICH) según el sexo del donante y del receptor?

36. ¿Se menciona que existen diferencias en el resultado del trasplante según sexo del

donante y receptor?

CONSECUENCIAS A LARGO PLAZO

37. ¿Se describen las diferencias por sexo en la fertilidad, como consecuencia a largo plazo?

38. ¿Se describen las diferencias por sexo en la actividad sexual, como consecuencia a largo

plazo?

39. ¿Se describen las diferencias por sexo en los niveles hormonales, como consecuencia a

largo plazo?

40. ¿Se describe en mujeres la disfunción ovárica, como consecuencia a largo plazo?

41. ¿Se describe en hombres la disfunción testicular, como consecuencia a largo plazo?

42. ¿Se describe en mujeres la atrofia del epitelio vaginal, como consecuencia a largo plazo?

43. ¿Se describe en mujeres la hipoplasia de endometrio, como consecuencia a largo plazo?

44. ¿Se describe en mujeres la menopausia precoz, como consecuencia a largo plazo?
